# Supplementary material for: In search of the bottlenecks of ammonia synthesis over Ru/Vulcan under ambient conditions
Source: Royal Society of Chemistry journal article supplement (doi:10.1039/d2fd00173j), 2022-12-21
Supplement: d2fd00173j1.pdf [file d2fd00173j1.pdf]

## Electronic Supplementary Information

### **In the search for the bottlenecks of ammonia synthesis over Ru/Vulcan under ambient conditions**

Mustafa Yasin Aslan<sup>1</sup>, Ersen Mete<sup>2</sup>, Deniz Üner<sup>1,\*</sup>

<sup>1</sup>Department of Chemical Engineering, Middle East Technical University, Ankara 06800, Turkey

<sup>2</sup>Department of Physics, Balıkesir University, Balıkesir 10145, Turkey

(\*uner@metu.edu.tr)

## S.1. IR spectra of bare Vulcan and empty reactor cell

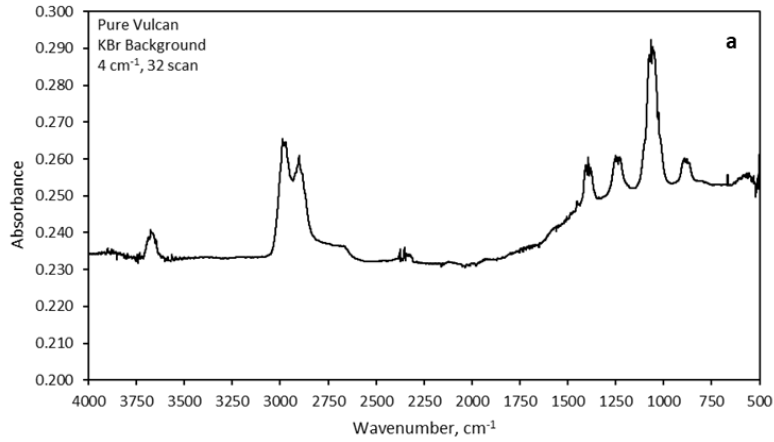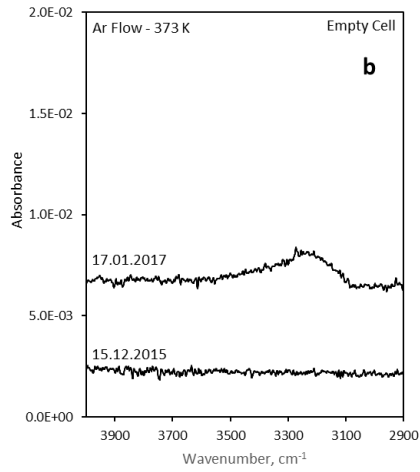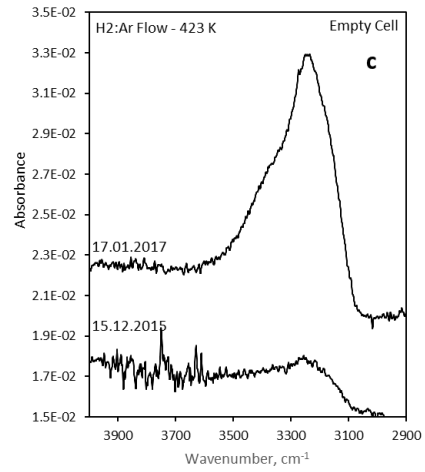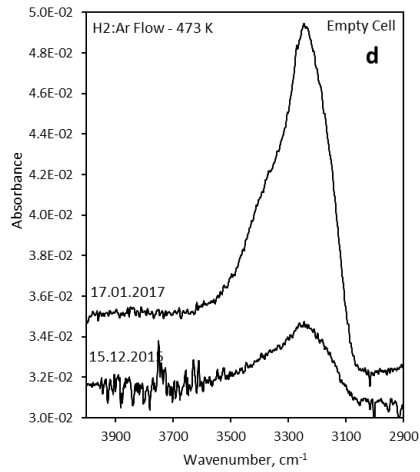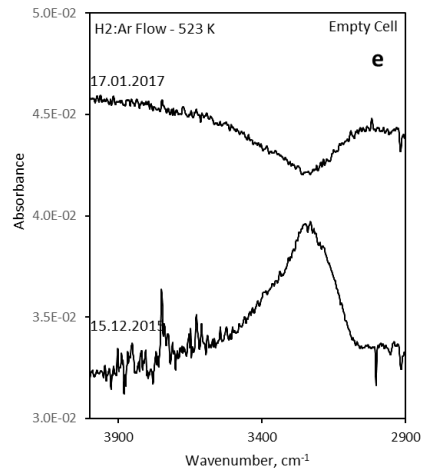

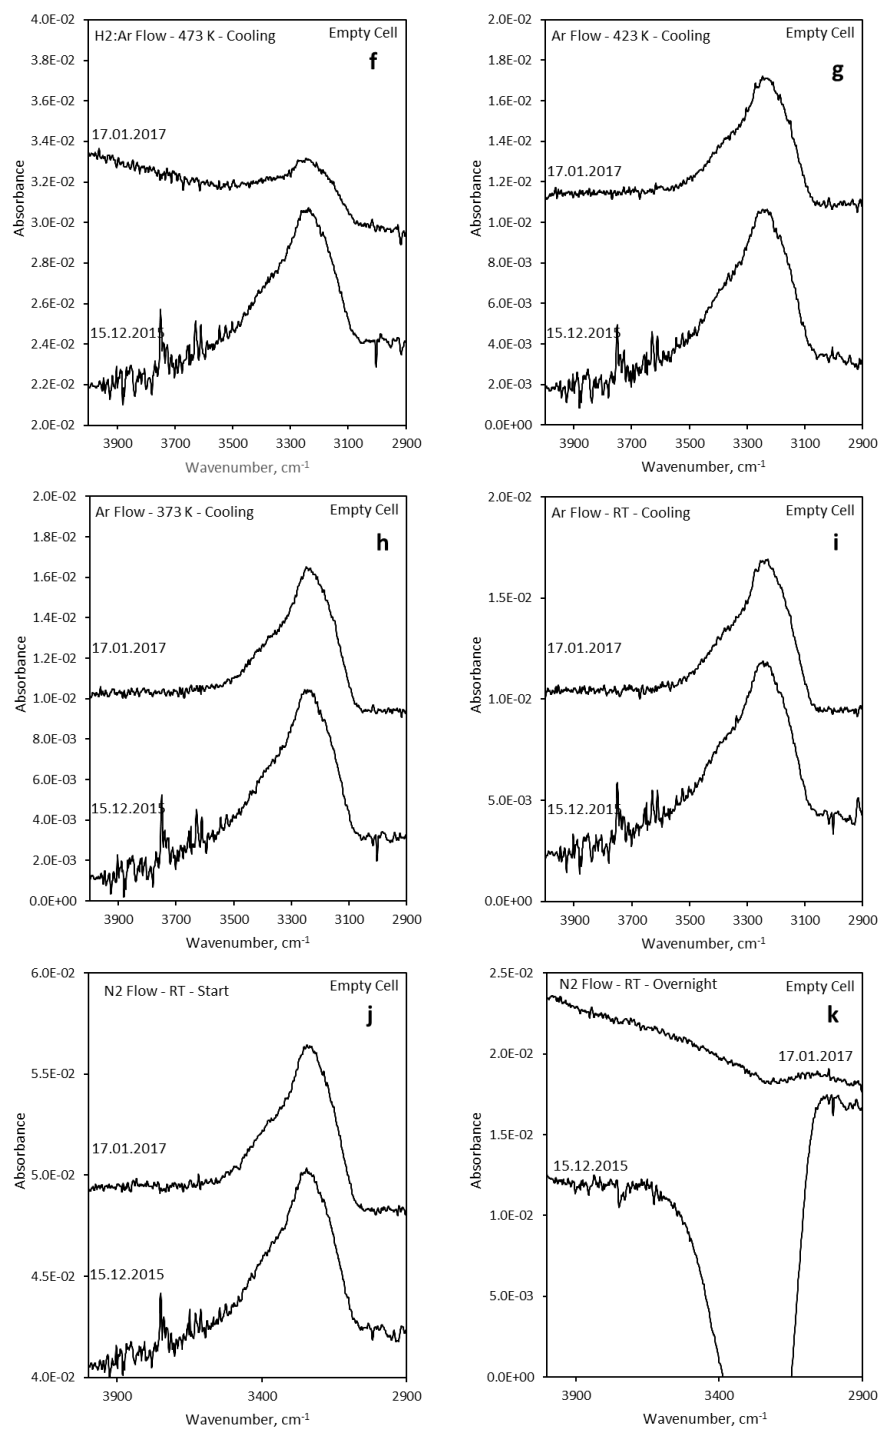

Figure S.1.(a) DRIFT spectra of bare Vulcan; (b-k) DRIFT spectra of empty sample holder between  $4000\text{ cm}^{-1}$  and  $2900\text{ cm}^{-1}$  wavenumber exposed to experimental steps

## S.2. DRIFTS spectrum of liquid NH<sub>4</sub>OH

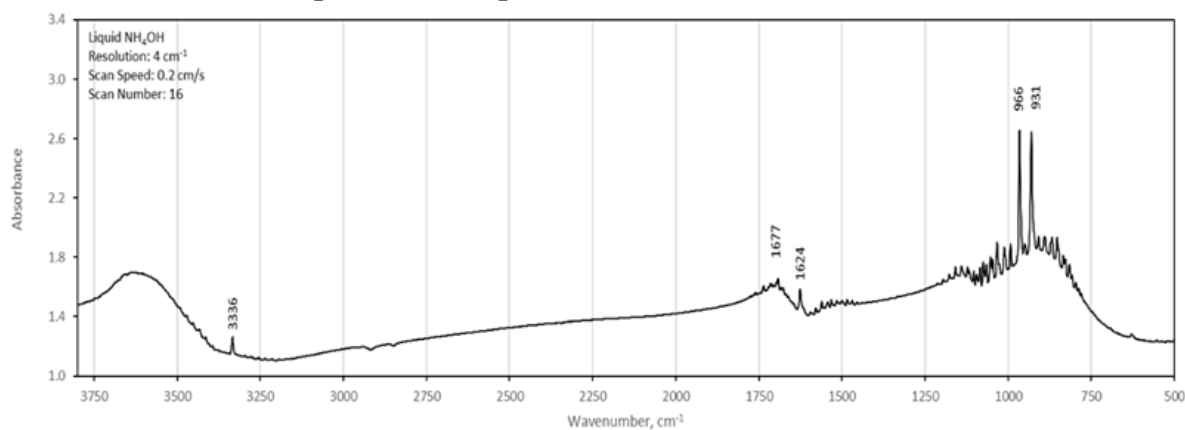

Figure S.2. IR Spectra of Liquid NH<sub>4</sub>OH (recorded at room temperature and under atmospheric pressure)

## S.3. NH<sub>3</sub> Molecule in Gas Phase

Table S1. Calculated vibrational IR frequencies and intensities of NH<sub>3</sub>.

| Mode | Freq. (cm <sup>-1</sup> ) | Intensity |
|------|---------------------------|-----------|
| 1    | 3526.6                    | 0.022     |
| 2    | 3526.1                    | 0.022     |
| 3    | 3401.7                    | 0.058     |
| 4    | 1620.4                    | 0.117     |
| 5    | 1619.2                    | 0.117     |
| 6    | 1006.8                    | 1.000     |
| 7    | 71.4                      | 0.430     |
| 8    | 86.9                      | 0.433     |

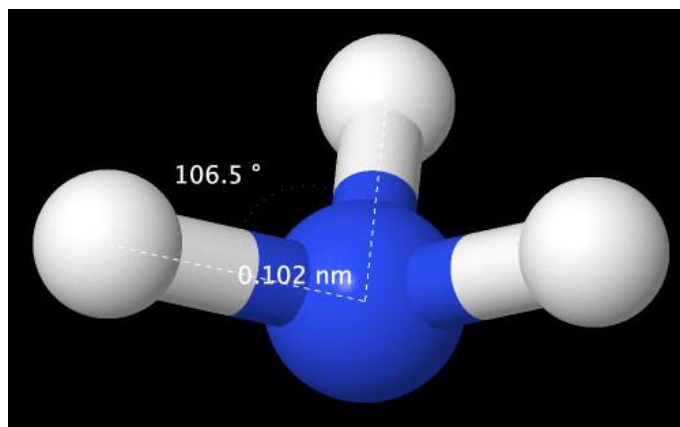

Figure S3. DFT-optimized geometry of NH<sub>3</sub>.

#### S.4. N-NH Molecule in Gas Phase

**Table S2.** Calculated vibrational IR frequencies and intensities of N-NH.

| Mode | Freq. (cm <sup>-1</sup> ) | Intensity |
|------|---------------------------|-----------|
| 1    | 2592.9                    | 1.000     |
| 2    | 1904.7                    | 0.300     |
| 3    | 1093.4                    | 0.353     |
| 4    | 80.6                      | 0.386     |
| 5    | 19.6                      | 0.041     |
| 6    | 15.7                      | 0.026     |

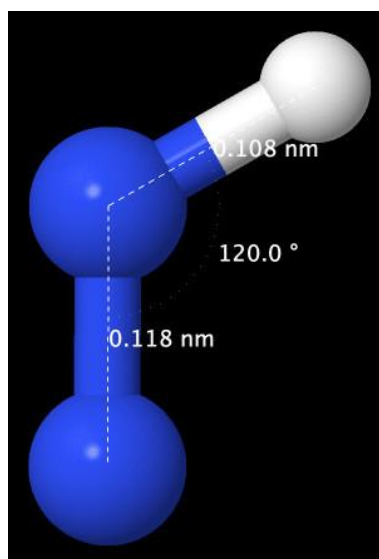

**Figure S4.** DFT-optimized geometry of N-NH.

### S.5. H-atom Addition to N-NH ( $\text{N}_2\text{H}+\text{H}$ )

**Table S3.** Calculated vibrational IR frequencies and intensities of HN-NH (final structure).

| Mode | Freq. ( $\text{cm}^{-1}$ ) | Intensity |
|------|----------------------------|-----------|
| 1    | 3149.2                     | 0.567     |
| 2    | 1314.9                     | 0.960     |
| 3    | 1303.3                     | 1.000     |

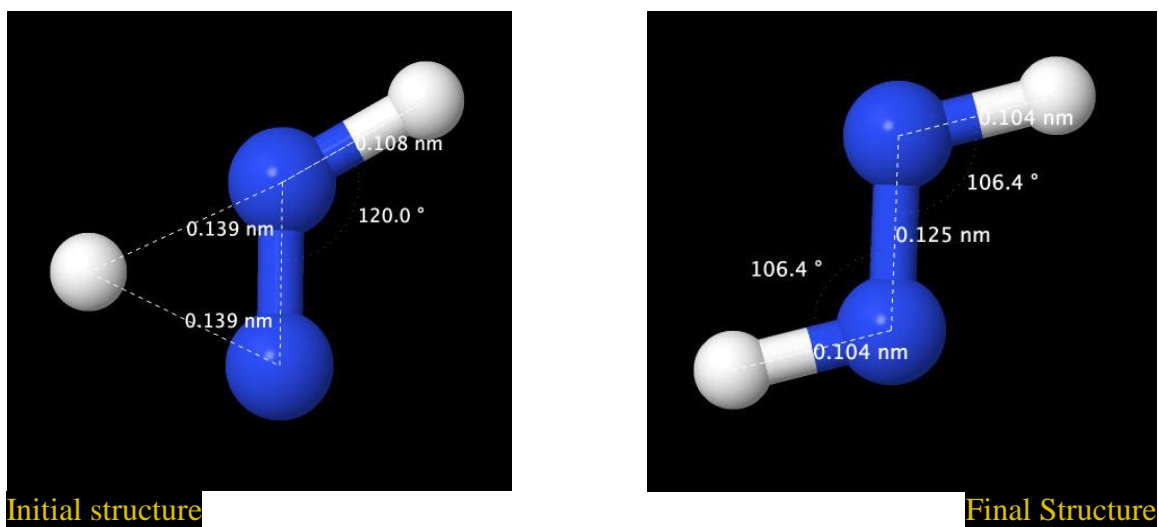

**Figure S5.** Initial (left) and DFT-optimized (right) geometries of N-NH + H .

## S.6. N-NH<sub>2</sub> Molecule in Gas Phase

**Table S4.** Calculated vibrational IR frequencies and intensities of N-NH<sub>2</sub>.

| Mode | Freq. (cm <sup>-1</sup> ) | Intensity |
|------|---------------------------|-----------|
| 1    | 2854.6                    | 0.796     |
| 2    | 2730.5                    | 1.000     |
| 3    | 1698.7                    | 0.079     |
| 4    | 1625.1                    | 0.178     |
| 5    | 1284.6                    | 0.048     |
| 6    | 996.1                     | 0.309     |
| 7    | 66.0                      | 0.022     |
| 8    | 38.8                      | 0.098     |
| 9    | 13.0                      | 0.075     |
| 10   | 10.9                      | 0.030     |
| 11   | 7.8                       | 0.023     |

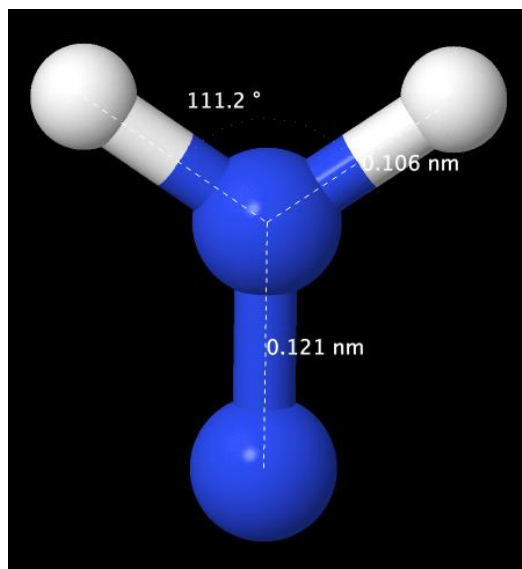

**Figure S6.** DFT-optimized geometry of N-NH<sub>2</sub>.

### S.7. H-atom Addition to N-NH<sub>2</sub> (N<sub>2</sub>H<sub>2</sub>+H)

**Table S5.** Calculated vibrational IR frequencies and intensities of HN-NH<sub>2</sub> (final structure).

| Mode | Freq. (cm <sup>-1</sup> ) | Intensity |
|------|---------------------------|-----------|
| 1    | 3548.2                    | 0.155     |
| 2    | 3384.7                    | 0.053     |
| 3    | 3346.7                    | 0.067     |
| 4    | 1605.0                    | 0.062     |
| 5    | 1446.4                    | 0.126     |
| 6    | 1220.6                    | 0.011     |
| 7    | 1099.0                    | 0.216     |
| 8    | 659.3                     | 0.896     |
| 9    | 489.4                     | 1.000     |
| 10   | 36.9                      | 0.058     |
| 11   | 33.1                      | 0.217     |
| 12   | 30.7                      | 0.150     |
| 13   | 28.0                      | 0.177     |

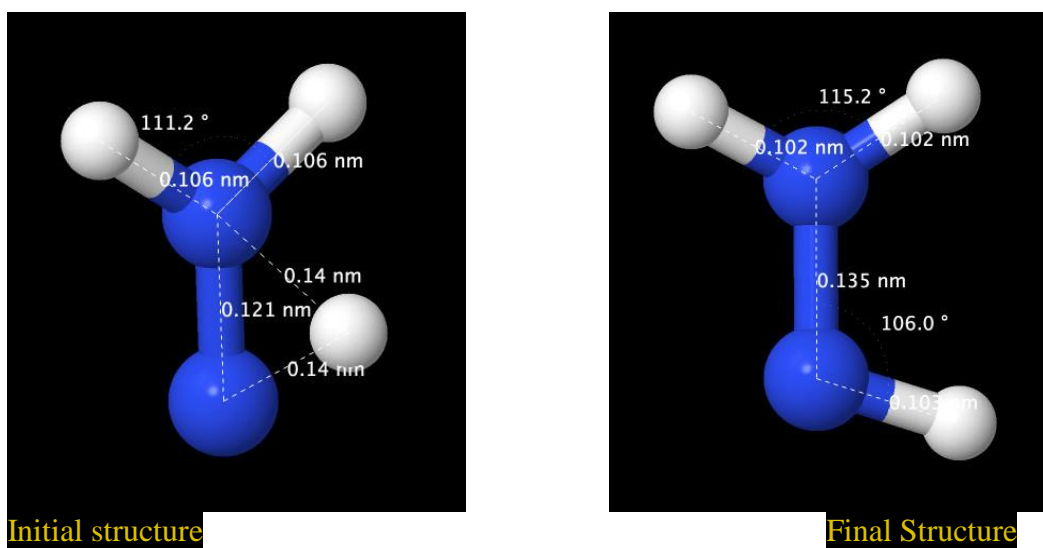

**Figure S7.** Initial (left) and DFT-optimized (right) geometries of N-NH<sub>2</sub> + H .



## S.8. N-NH<sub>3</sub> Molecule in Gas Phase

**Table S6.** Calculated vibrational IR frequencies and intensities of N-NH<sub>3</sub>.

| Mode | Freq. (cm <sup>-1</sup> ) | Intensity |
|------|---------------------------|-----------|
| 1    | 3051.9                    | 1.000     |
| 2    | 2994.5                    | 0.055     |
| 3    | 2994.3                    | 0.054     |
| 4    | 1558.0                    | 0.038     |
| 5    | 1556.4                    | 0.038     |
| 6    | 1415.7                    | 0.023     |
| 7    | 939.3                     | 0.110     |
| 8    | 936.6                     | 0.109     |
| 9    | 771.6                     | 0.221     |
| 10   | 40.1                      | 0.057     |
| 11   | 19.4                      | 0.105     |
| 12   | 22.2                      | 0.016     |
| 13   | 24.4                      | 0.166     |
| 14   | 43.4                      | 0.200     |

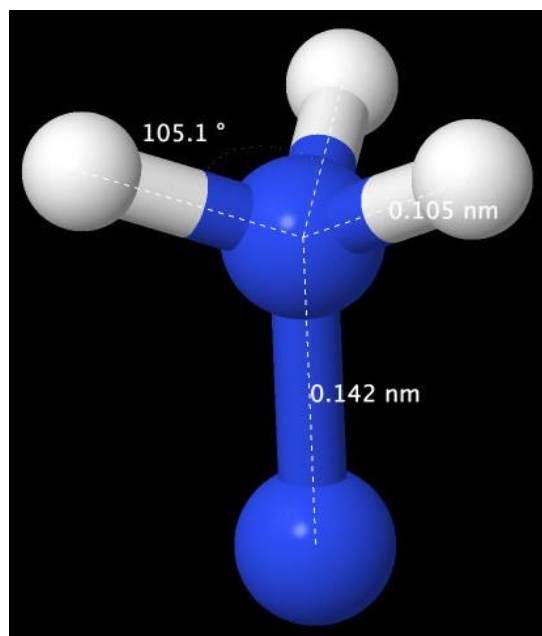

**Figure S8.** DFT-optimized geometry of N-NH<sub>3</sub>.

**S.9. H-atom Addition to HN-NH<sub>2</sub> (N<sub>2</sub>H<sub>3</sub> + H)**

**Table S7.** Calculated vibrational IR frequencies and intensities of H<sub>2</sub>N-NH<sub>2</sub>.

| Mode | Freq. (cm <sup>-1</sup> ) | Intensity |
|------|---------------------------|-----------|
| 1    | 3486.6                    | 0.013     |
| 2    | 3480.5                    | 0.013     |
| 3    | 3383.0                    | 0.043     |
| 4    | 3372.2                    | 0.171     |
| 5    | 1639.9                    | 0.068     |
| 6    | 1625.2                    | 0.090     |
| 7    | 1293.5                    | 0.021     |
| 8    | 1263.6                    | 0.035     |
| 9    | 1099.0                    | 0.118     |
| 10   | 955.8                     | 1.000     |
| 11   | 761.2                     | 0.483     |
| 12   | 444.7                     | 0.277     |
| 13   | 103.2                     | 0.353     |
| 14   | 64.0                      | 0.076     |

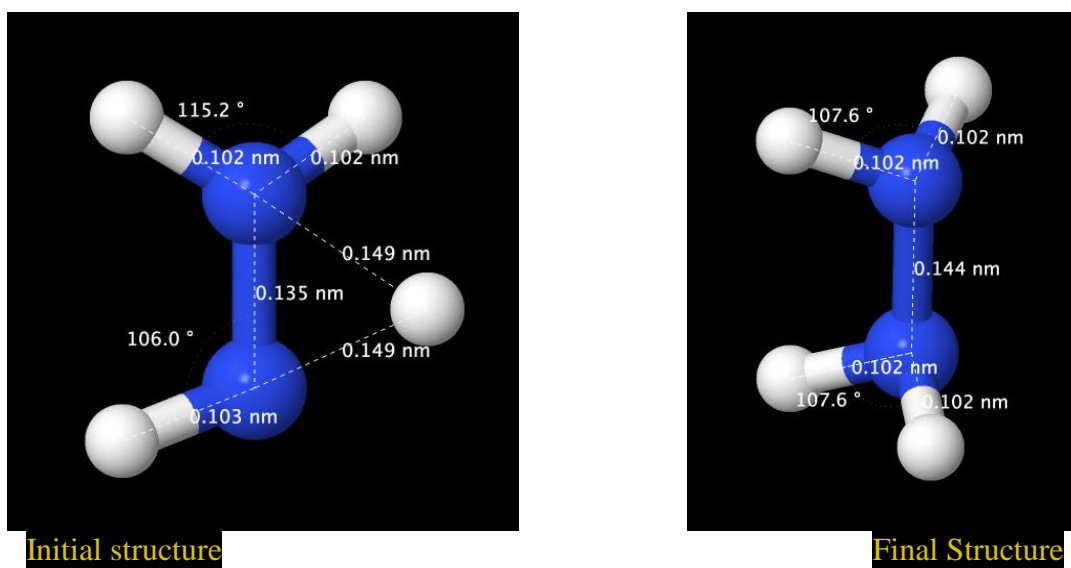

**Figure S9.** Initial (left) and DFT-optimized (right) geometries of HN-NH<sub>2</sub> + H .

## S.10. HN-NH<sub>3</sub> Molecule in Gas Phase

**Table S8.** Calculated vibrational IR frequencies and intensities of HN-NH<sub>3</sub>.

| Mode | Freq. (cm <sup>-1</sup> ) | Intensity |
|------|---------------------------|-----------|
| 1    | 3406.2                    | 0.059     |
| 2    | 3326.1                    | 0.137     |
| 3    | 3041.8                    | 1.000     |
| 4    | 2941.0                    | 0.120     |
| 5    | 1619.1                    | 0.103     |
| 6    | 1577.8                    | 0.014     |
| 8    | 1436.7                    | 0.023     |
| 9    | 1037.3                    | 0.119     |
| 10   | 1013.7                    | 0.152     |
| 11   | 814.5                     | 0.224     |
| 12   | 372.5                     | 0.273     |
| 13   | 58.1                      | 0.027     |
| 14   | 37.2                      | 0.158     |
| 15   | 25.2                      | 0.099     |

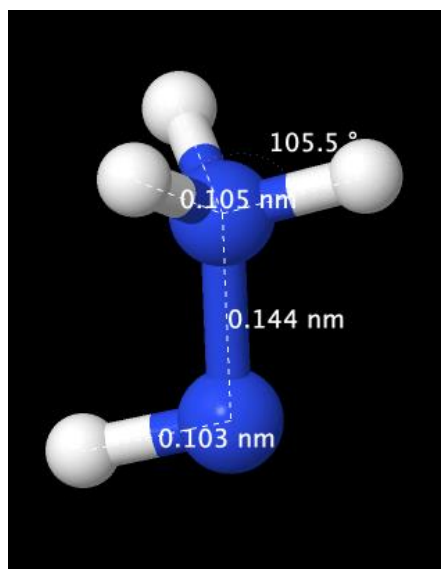

**Figure S10.** DFT-optimized geometry of HN-NH<sub>3</sub>.

### S.11. Ru-NH<sub>3</sub> Molecule in Gas Phase

**Table S9.** Calculated vibrational IR frequencies and intensities of Ru-NH<sub>3</sub>.

| Mode | Freq. (cm <sup>-1</sup> ) | Intensity |
|------|---------------------------|-----------|
| 1    | 3390.6                    | 0.070     |
| 2    | 3390.4                    | 0.070     |
| 3    | 3311.3                    | 0.388     |
| 4    | 1573.1                    | 0.124     |
| 5    | 1570.5                    | 0.124     |
| 6    | 1119.1                    | 1.000     |
| 7    | 573.2                     | 0.032     |
| 8    | 571.7                     | 0.032     |
| 9    | 467.7                     | 0.024     |
| 10   | 58.0                      | 0.015     |
| 11   | 30.9                      | 0.055     |
| 12   | 21.1                      | 0.072     |

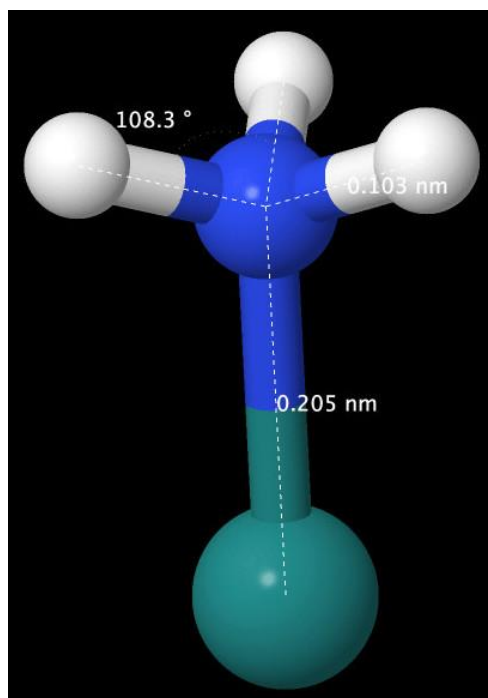

**Figure S11.** DFT-optimized geometry of Ru-NH<sub>3</sub>.

## S.12. Ru-N-NH<sub>3</sub> Structure in Gas Phase

**Table S10.** Calculated vibrational IR frequencies and intensities of Ru-N-NH<sub>3</sub> (final structure).

| Mode | Freq. (cm <sup>-1</sup> ) | Intensity |
|------|---------------------------|-----------|
| 1    | 3518.6                    | 0.011     |
| 2    | 3516.9                    | 0.011     |
| 3    | 3399.3                    | 0.060     |
| 4    | 1624.9                    | 0.051     |
| 5    | 1621.2                    | 0.052     |
| 6    | 1205.5                    | 0.288     |
| 7    | 1039.1                    | 1.000     |
| 8    | 71.1                      | 0.217     |
| 9    | 31.8                      | 0.010     |
| 10   | 16.1                      | 0.023     |
| 11   | 15.4                      | 0.014     |
| 12   | 9.9                       | 0.006     |
| 13   | 28.9                      | 0.020     |
| 14   | 75.0                      | 0.123     |
| 15   | 82.5                      | 0.136     |

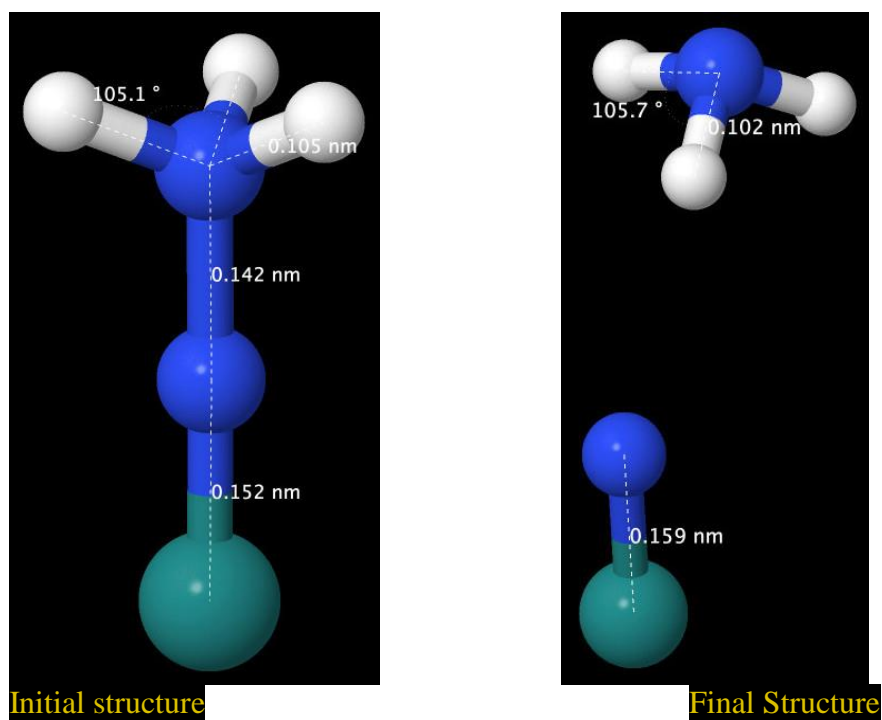

**Figure S12.** Initial (left) and DFT-optimized (right) geometries of Ru-N-NH<sub>3</sub>.

### S.13. Ru-N<sub>2</sub>H<sub>4</sub> (Ru+H<sub>2</sub>N-NH<sub>2</sub>) Structure

**Table S11.** Calculated vibrational IR frequencies and intensities of Ru-N<sub>2</sub>H<sub>4</sub> (final structure).

| Mode | Freq. (cm <sup>-1</sup> ) | Intensity |
|------|---------------------------|-----------|
| 1    | 3147.5                    | 0.156     |
| 2    | 3130.0                    | 1.000     |
| 3    | 3115.0                    | 0.132     |
| 4    | 1499.4                    | 0.047     |
| 5    | 1488.3                    | 0.125     |
| 6    | 1063.1                    | 0.022     |
| 7    | 1001.6                    | 0.049     |
| 8    | 970.1                     | 0.015     |
| 9    | 961.9                     | 0.006     |
| 10   | 553.4                     | 0.005     |
| 11   | 510.3                     | 0.024     |
| 12   | 355.6                     | 0.005     |

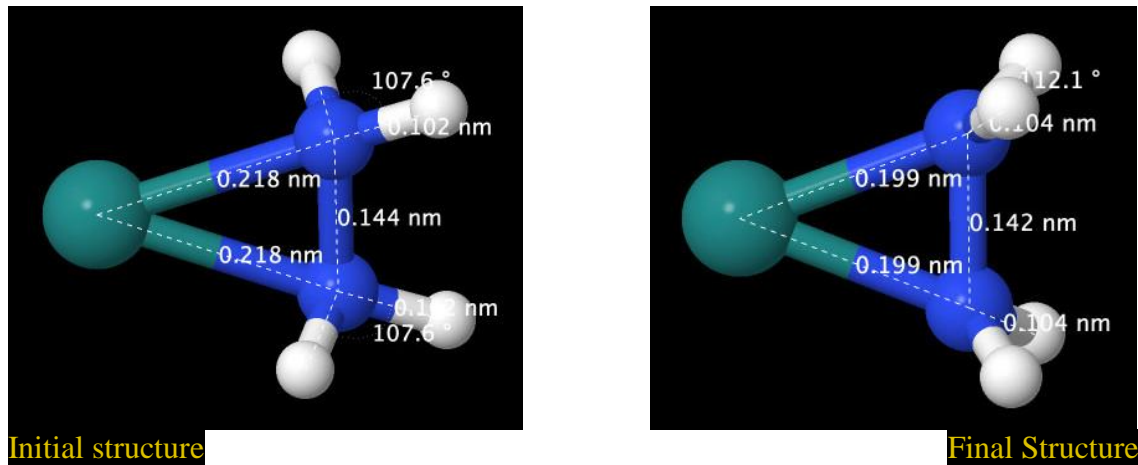

**Figure S13.** Initial (left) and DFT-optimized (right) geometries of Ru-N<sub>2</sub>H<sub>4</sub>.

## S.14. H<sub>2</sub>O-NH<sub>3</sub> Structure in Gas Phase

**Table S12.** Calculated vibrational IR frequencies and intensities of H<sub>2</sub>O-NH<sub>3</sub> (final structure).

| Mode | Freq. (cm <sup>-1</sup> ) | Intensity |
|------|---------------------------|-----------|
| 1    | 3801.4                    | 0.055     |
| 2    | 3529.5                    | 0.013     |
| 3    | 3526.8                    | 0.014     |
| 4    | 3406.4                    | 0.018     |
| 5    | 3352.8                    | 1.000     |
| 6    | 1631.0                    | 0.004     |
| 7    | 1619.4                    | 0.024     |
| 8    | 1608.1                    | 0.063     |
| 9    | 1059.9                    | 0.164     |
| 10   | 752.5                     | 0.095     |
| 11   | 483.4                     | 0.100     |
| 12   | 214.5                     | 0.055     |
| 13   | 198.1                     | 0.044     |
| 14   | 192.3                     | 0.016     |
| 15   | 75.2                      | 0.105     |
| 16   | 22.9                      | 0.011     |
| 17   | 12.3                      | 0.009     |

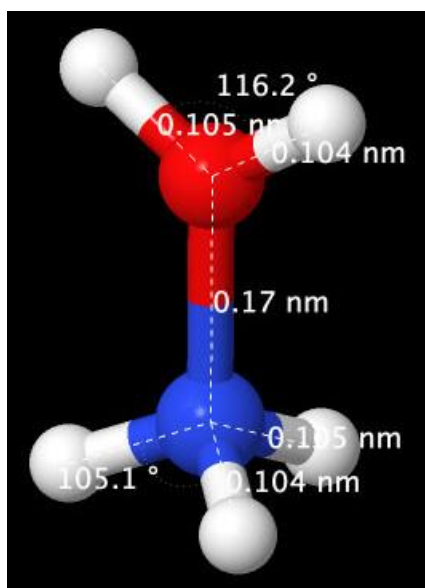

**Initial structure**

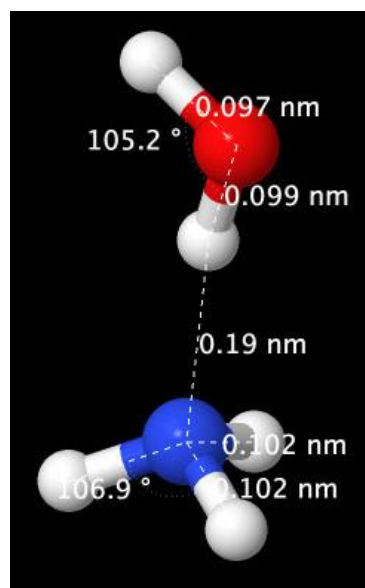

**Final Structure**

**Figure S14.** Initial (left) and DFT-optimized (right) geometries of H<sub>2</sub>O-NH<sub>3</sub> .
